# Supplementary material for: Effect of Oxygen Content on the Properties of Sputtered TaOx Electrolyte Film in All-Solid-State Electrochromic Devices
Source: MDPI journal article supplement (doi:10.3390/coatings12121831), 2022-11-26
Supplement: s1 [file s1]

# Supplementary Materials: Effect of Oxygen Content on the Properties of Sputtered TaO<sub>x</sub> Electrolyte Film in All-Solid-State Electrochromic Devices

Jiuyong Li <sup>1,2</sup>, Weiming Liu <sup>1,2</sup>, Youxiu Wei <sup>1,2</sup> and Yue Yan <sup>1,2,\*</sup>

<sup>1</sup> Beijing Institute of Aeronautical Materials, Beijing 100095, China

<sup>2</sup> Beijing Engineering Research Center of Advanced Structural Transparencies to the Modern Traffic System, Beijing 100095, China

\* Correspondence: yue.yan@biam.ac.cn

**Citation:** Li, J.; Liu, W.; Wei, Y.; Yan, Y. Effect of Oxygen Content on the Properties of Sputtered TaO<sub>x</sub> Electrolyte Film in All-Solid-State Electrochromic Devices. *Coatings* **2022**, *12*, 1831. <https://doi.org/10.3390/coatings12121831>

Academic Editor: Marcello Campajola

Received: 25 October 2022

Accepted: 23 November 2022

Published: 26 November 2022

**Publisher's Note:** MDPI stays neutral with regard to jurisdictional claims in published maps and institutional affiliations.

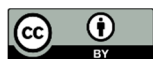

**Copyright:** © 2022 by the author. Licensee MDPI, Basel, Switzerland. This article is an open access article distributed under the terms and conditions of the Creative Commons Attribution (CC BY) license (<https://creativecommons.org/licenses/by/4.0/>).

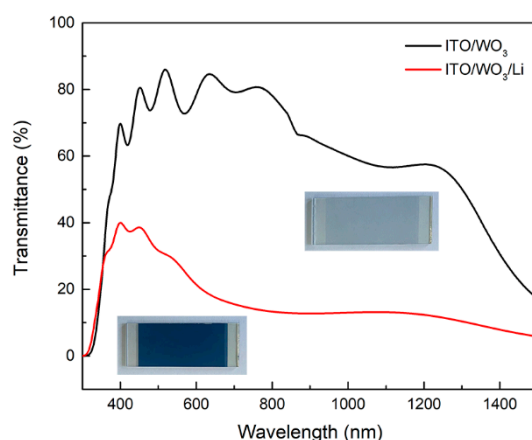

**Figure S1.** Optical transmittance spectra and corresponding digital photos of ITO/WO<sub>3</sub> and ITO/WO<sub>3</sub>/Li.

Before Li deposition, ITO/WO<sub>3</sub> has high transmittance and light color. After lithium deposition, the transmittance of ITO/WO<sub>3</sub>/Li decreases significantly, and the color becomes dark blue, indicating that Li diffuses directly into WO<sub>3</sub> layer to reduce it to Li<sub>x</sub>WO<sub>3</sub>.

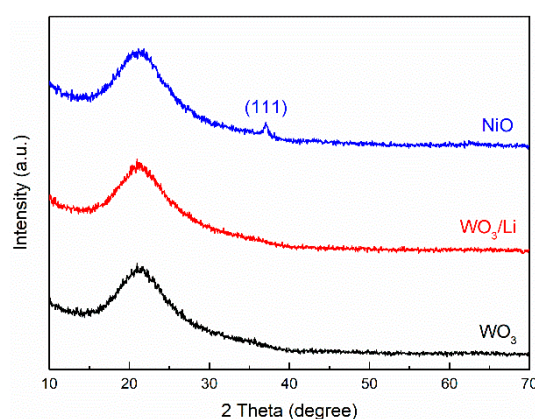

**Figure S2.** XRD patterns of NiO, WO<sub>3</sub>/Li and WO<sub>3</sub> films on silica glass substrates.

XRD results show that the WO<sub>3</sub> and WO<sub>3</sub>/Li films are amorphous and NiO exhibits a face-centered cubic structure. A weak peak located at 37.09° was observed in the XRD pattern of NiO film, which belongs to the (111) lattice plane (PDF card (No. 89-7130)).

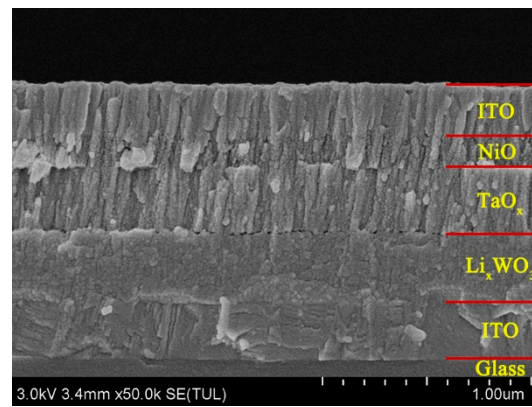

**Figure S3.** The cross-sectional morphology of the ECD after 1000 cycles.

The cross-sectional SEM images of the ECD after 10 and 1000 cycles have the same morphology.
